# Supplementary material for: Dual-purpose high-efficiency air filter paper loaded with reactive zirconium hydroxide for the filtration aerosols and degradation of chemical warfare agents
Source: Royal Society of Chemistry journal article supplement (doi:10.1039/d1ra06903a), 2021-01-01
Supplement: d1ra06903a1.pdf [file d1ra06903a1.pdf]

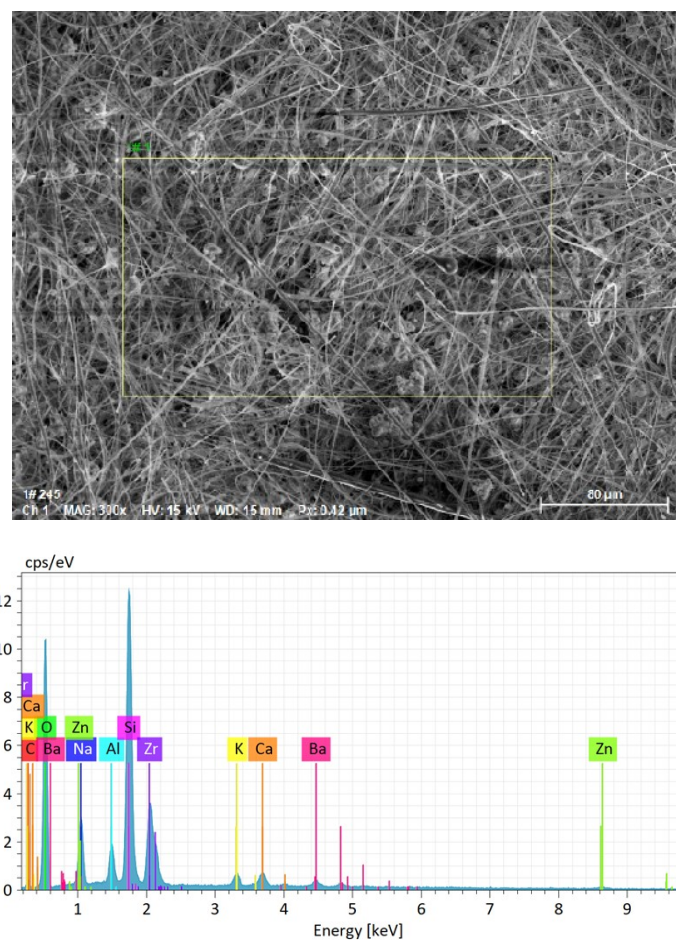

Figure S1. (a) FE-SEM image and EDS spectral result of all the elements of SD-AFP;  
(b) EDS diagram

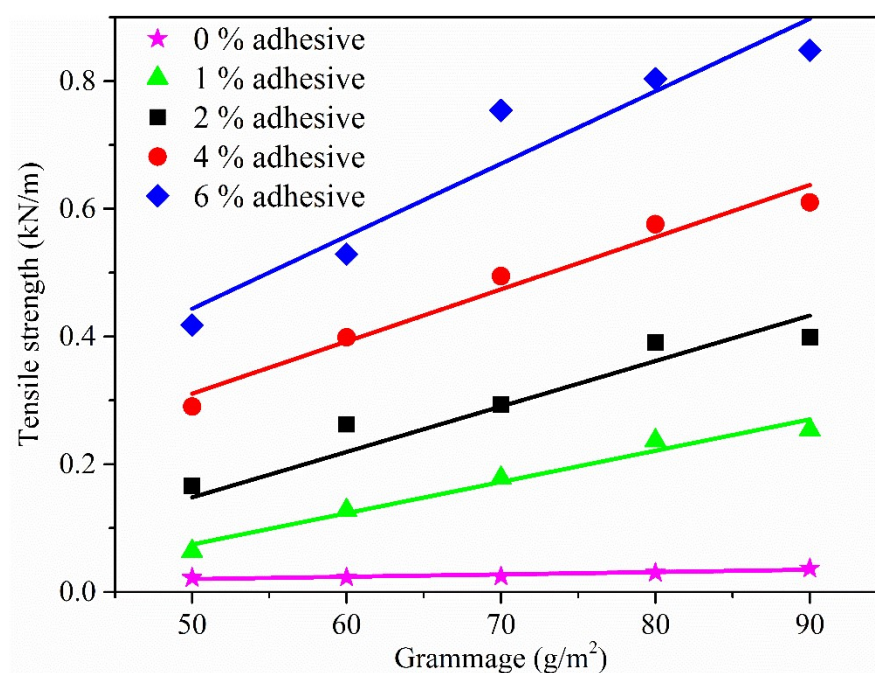

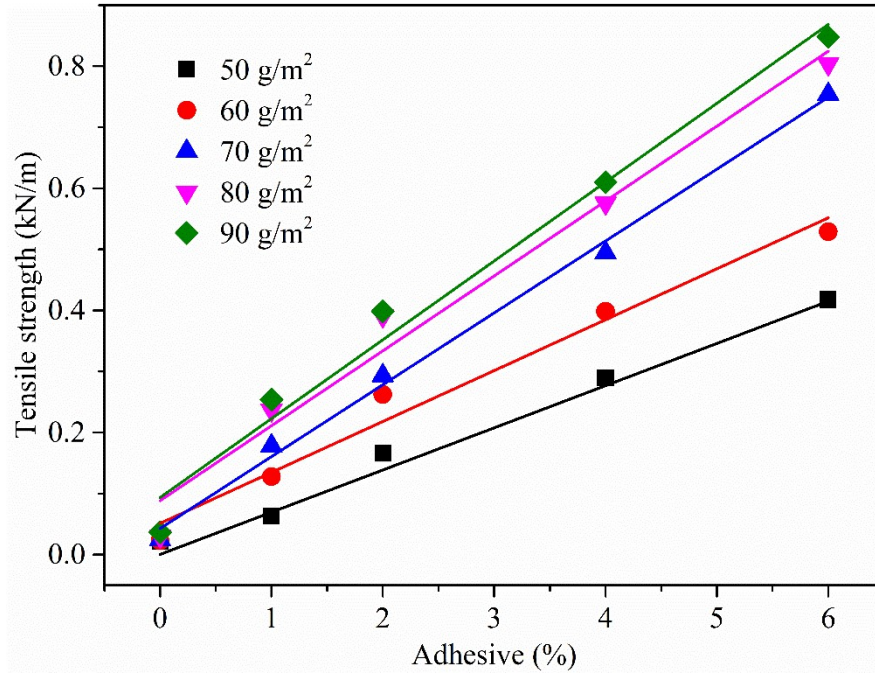

Figure S2. Tensile strength of SD-AFP: (a) tensile strength varies with fiber grammage; (b) tensile strength varies with the amount of adhesive

Table S1. Linear parameters of the tensile strength change varies with the fiber grammage

| Adhesive/% | Slope    | Intercept | R <sup>2</sup> |
|------------|----------|-----------|----------------|
| 0          | 3.66E-4  | 1.66E-3   | 0.8794         |
| 1          | 4.90 E-3 | -0.17     | 0.9725         |
| 2          | 7.10 E-3 | -0.21     | 0.8999         |
| 4          | 8.20 E-3 | -0.10     | 0.9705         |
| 6          | 1.14 E-2 | -0.12     | 0.9196         |

Table S2. Linear parameters of the tensile strength change varies with the amount of adhesive

| Grammage/g·m <sup>-2</sup> | Slope | Intercept | R <sup>2</sup> |
|----------------------------|-------|-----------|----------------|
| 50                         | 0.07  | 4.00E-04  | 0.9848         |
| 60                         | 0.08  | 0.05      | 0.9786         |
| 70                         | 0.12  | 0.04      | 0.9960         |
| 80                         | 0.12  | 0.09      | 0.9782         |
| 90                         | 0.13  | 0.09      | 0.9828         |

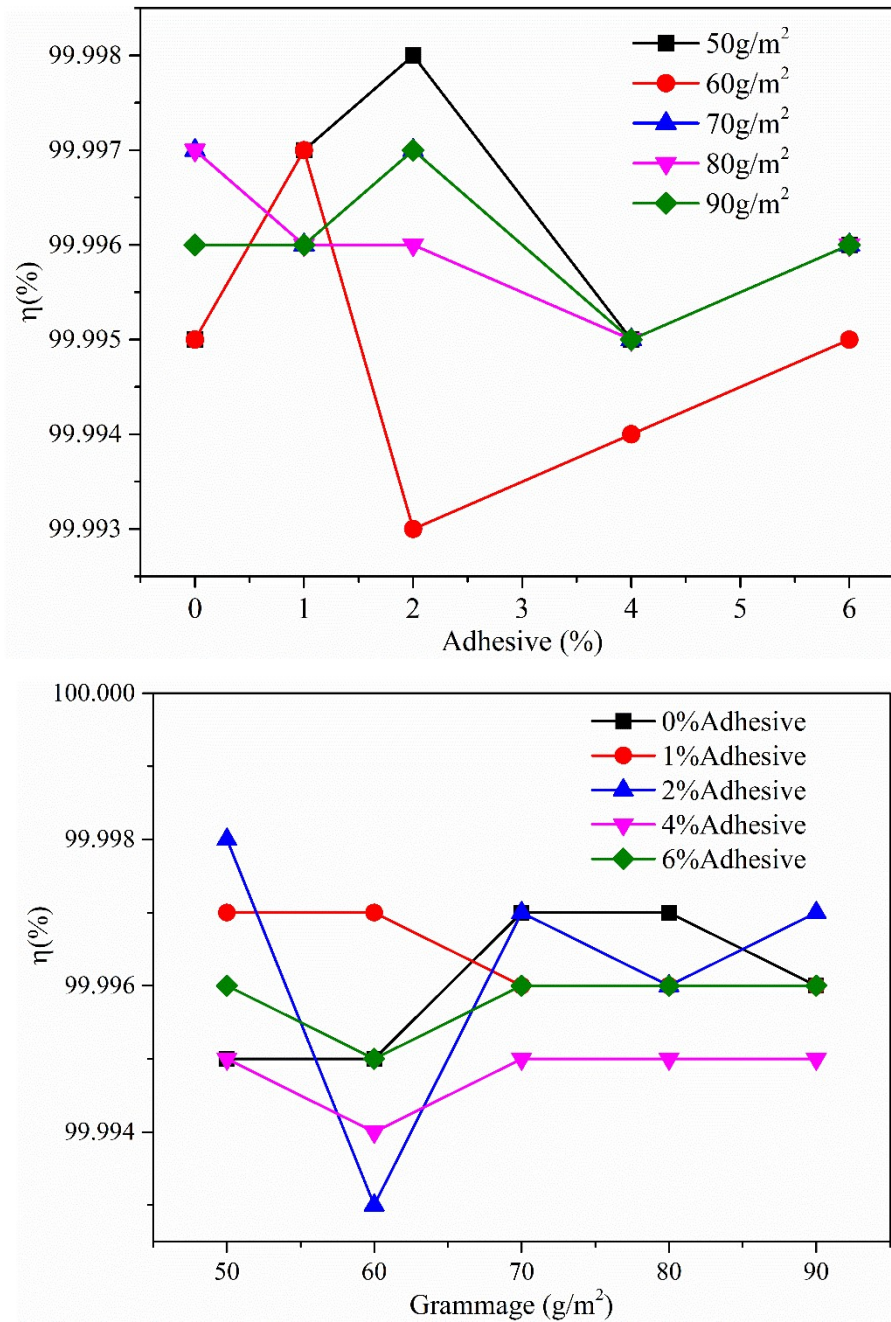

Figure S3. Filtration efficiency of SD-AFP: (a) filtration efficiency varies with the amount of adhesive; (b) filtration efficiency varies with the fiber grammage



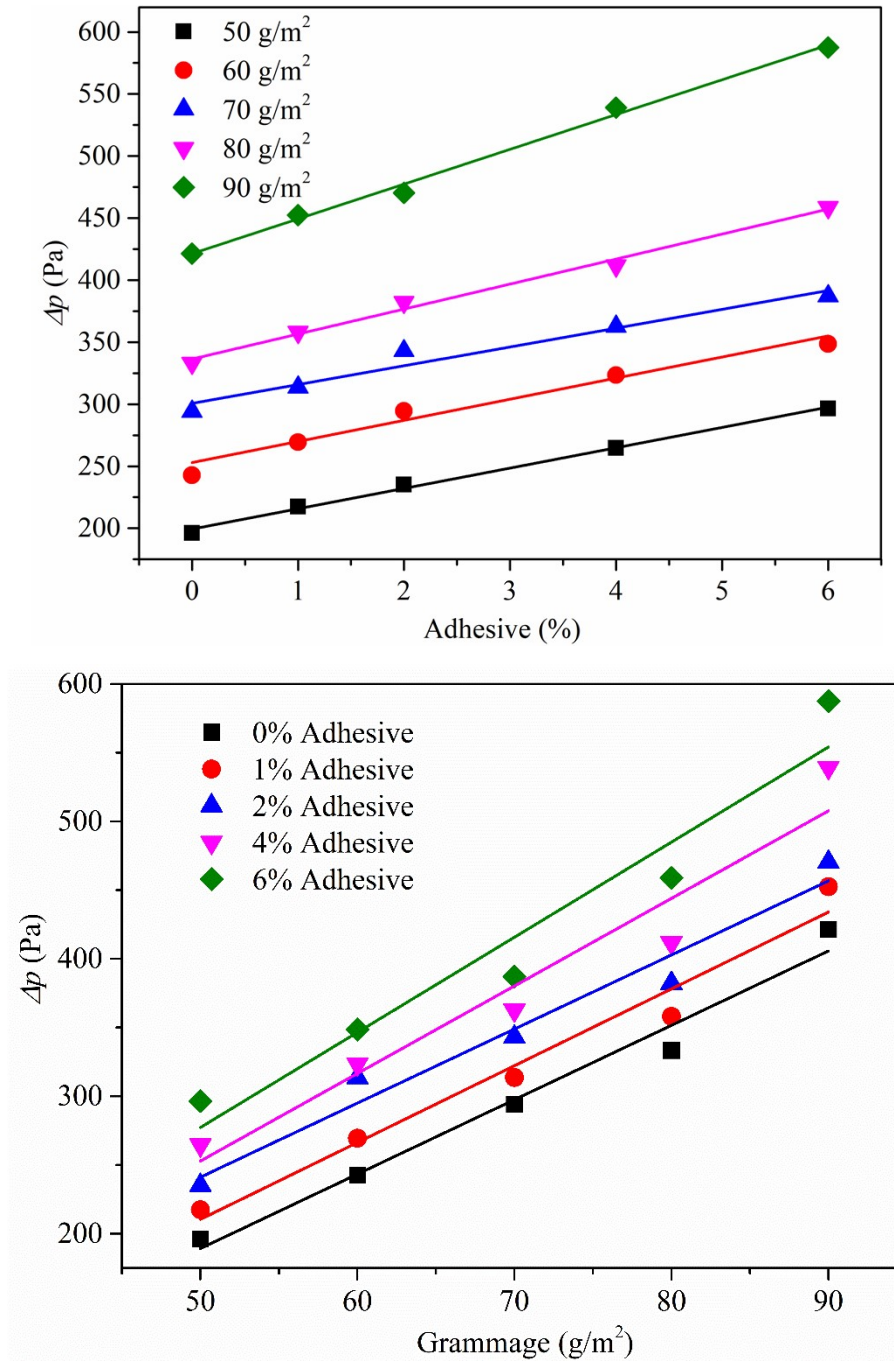

Figure S4. Pressure drop of SD-AFP: (a) resistance varies with the amount of adhesive; (b) resistance varies with the fiber grammage

Table S3. Linear parameters of the resistance change varies with the amount of adhesive

| Grammage/g·m <sup>-2</sup> | Slope | Intercept | R <sup>2</sup> |
|----------------------------|-------|-----------|----------------|
| 50                         | 16.38 | 199.36    | 0.9848         |
| 60                         | 17.02 | 252.93    | 0.9475         |
| 70                         | 15.16 | 300.63    | 0.9609         |
| 80                         | 20.14 | 336.40    | 0.9922         |
| 90                         | 28.03 | 421.29    | 0.9828         |

Table S4. Linear parameters of the resistance change varies with the fiber grammage

| Adhesive/% | Slope | Intercept | R <sup>2</sup> |
|------------|-------|-----------|----------------|
| 0          | 5.41  | -81.45    | 0.9785         |
| 1          | 5.59  | -69.03    | 0.9727         |
| 2          | 5.39  | -28.42    | 0.9658         |
| 4          | 6.37  | -65.66    | 0.9414         |
| 6          | 6.92  | -68.79    | 0.9412         |

Table S5. Linear parameters of the resistance change varies with the retention rate of ZH

| No. | Slope | Intercept | R <sup>2</sup> |
|-----|-------|-----------|----------------|
| a   | 0.64  | 197.50    | 0.9795         |
| b   | 0.99  | 215.67    | 0.9280         |
| c   | 0.51  | 255.83    | 0.9280         |
| d   | 0.90  | 249.27    | 0.9963         |
